# Supplementary material
Source: PubMed Central journal article supplement (PMC7443905)
Supplement: pnas.2008021117.sapp.pdf [file pnas.2008021117.sapp.pdf]

# Supplementary Figure 1

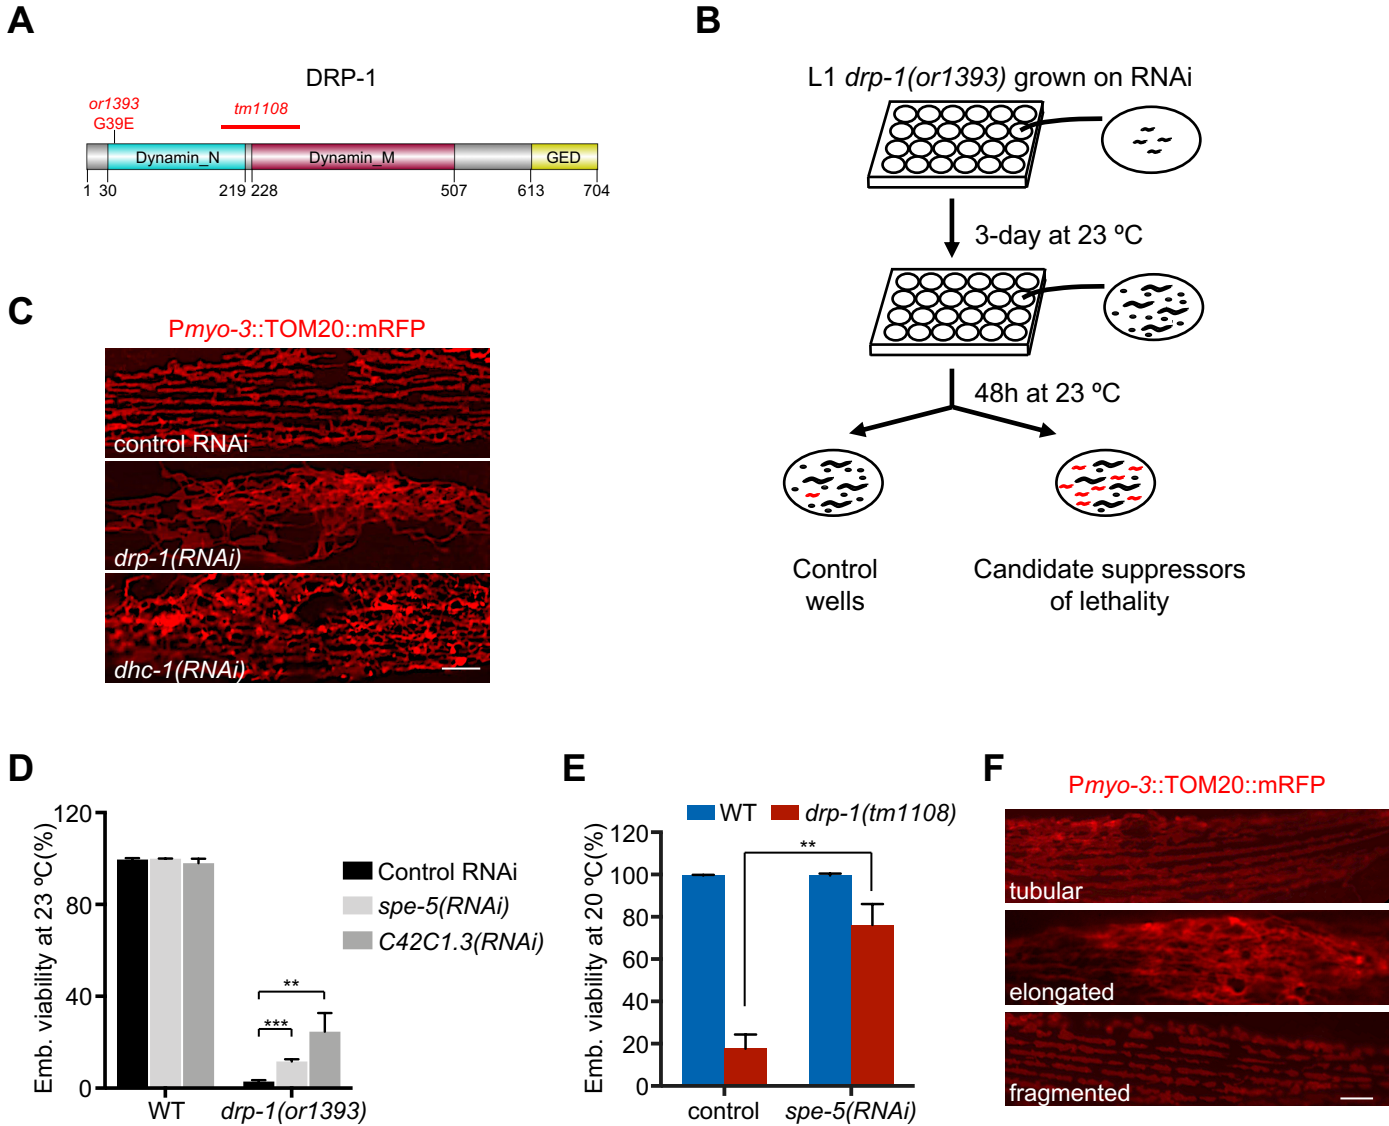

**Fig. S1. RNAi screen identifies gene inactivation suppresses *drp-1* lethality**

(A) Schematic of the DRP-1 protein and the *drp-1(or1393)* and *drp-1(tm1108)* mutations.

(B) Diagram of the RNAi screen workflow for suppressors of *drp-1(or1393)* lethality. See Methods for details.

(C) Mitochondrial morphology in body wall muscles after indicated RNAi treatment. Scale bar, 5  $\mu$ m.

(D) Viability of wild-type and *drp-1(or1393)* after indicated RNAi treatment at 23°C. Mean  $\pm$  s.d. \*\*\* $P$  < 0.001, \*\* $P$  < 0.01.

(E) Viability of wild-type and *drp-1(tm1108)* in control versus *spe-5(RNAi)* animals. Mean  $\pm$  s.d. \*\* $P$  < 0.01.

(F) Examples of tubular, elongated and fragmented mitochondria in body wall muscles in wild-type. Scale bar, 5  $\mu$ m.

# Supplementary Figure 2

WT; control RNAi

*drp-1(tm1108)*; control RNAi

*drp-1(tm1108)*; *spe-5(RNAi)*

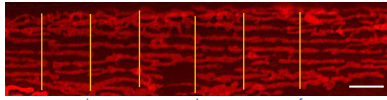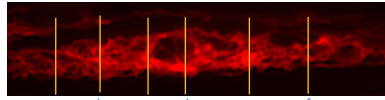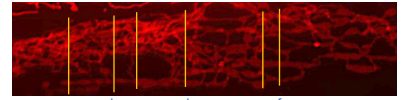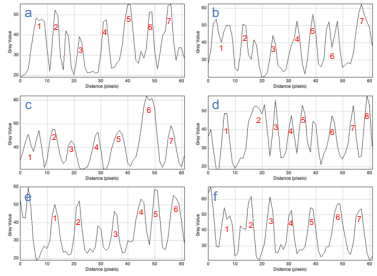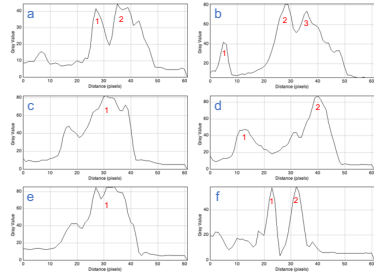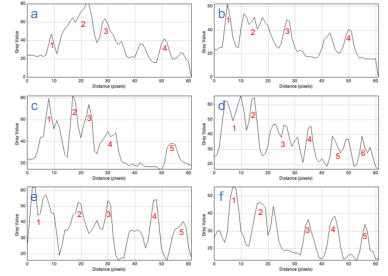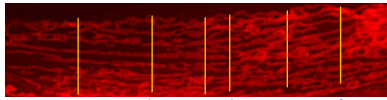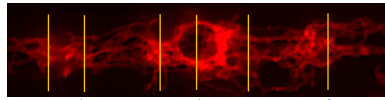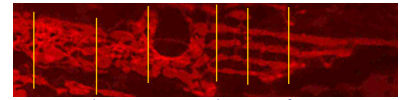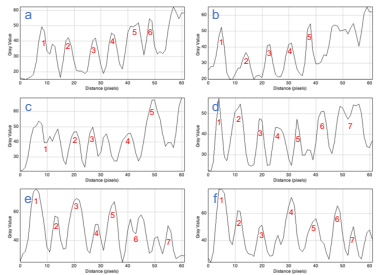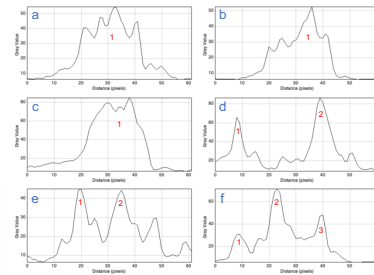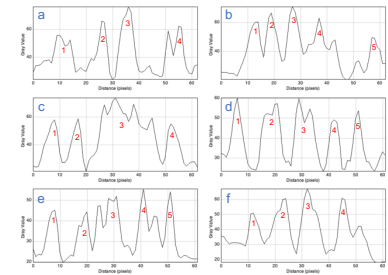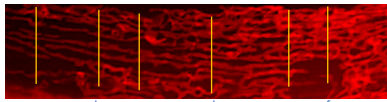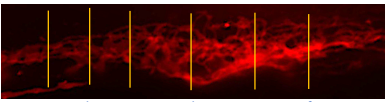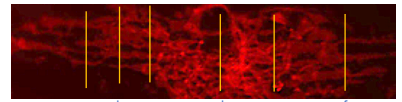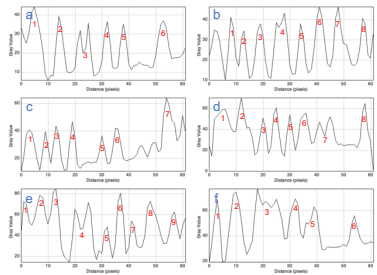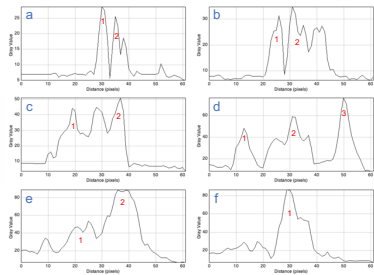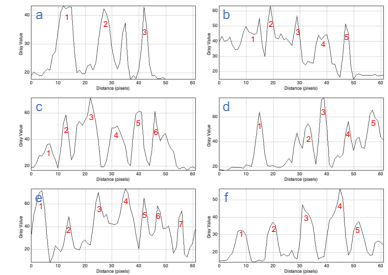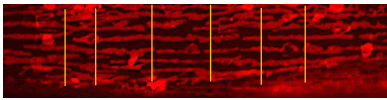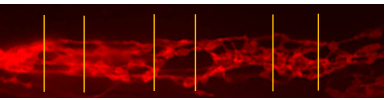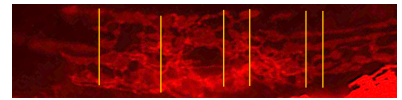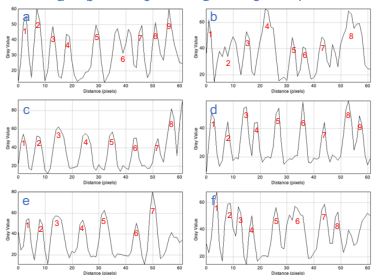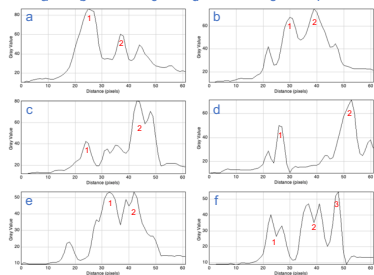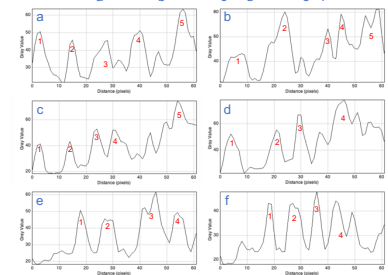

**Fig. S2. Representative images of mitochondrial morphology in indicated animals**

Mitochondrial morphology of wild-type and *drp-1(tm1108)* in control versus *spe-5(RNAi)* in a single body wall muscle cell. Mitochondria are visualized by a mitochondrial outer membrane localized mRFP fusion protein. Lower panels are plot profiles of the cross sections indicated by yellow lines. Criterion for a peak: peak to trough (both sides) > 20 Grey value units (y units). Scale bar, 5  $\mu\text{m}$ .

**A**

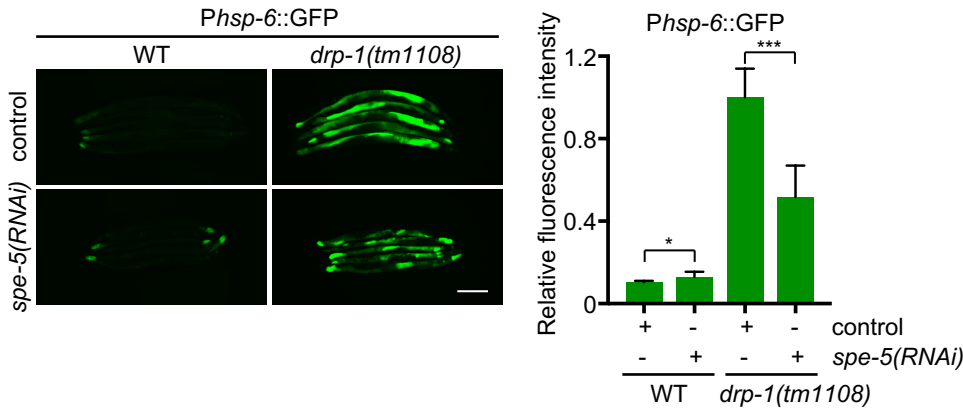

**B**

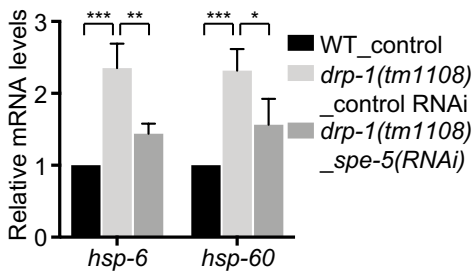

**C**

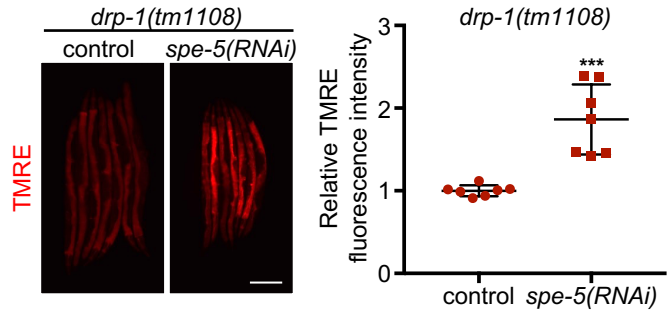

**Fig. S3. Inactivation of the vacuolar ATPase *spe-5* suppresses *drp-1* mitochondrial defects**

(A) *Phsp-6::GFP* expression in wild-type and *drp-1(tm1108)* animals grown on control versus *spe-5(RNAi)*. Mean  $\pm$  s.d. \*\*\* $P < 0.001$ , \* $P < 0.05$ . Scale bar, 0.2 mm.

(B) Endogenous expression levels of mitochondrial chaperone genes *hsp-6* and *hsp-60* in indicated animals. Mean  $\pm$  s.d. from at least three biological replicates. \*\*\* $P < 0.001$ , \*\* $P < 0.01$ , \* $P < 0.05$ .

(C) Animals with indicated treatment were stained with TMRE (tetramethylrhodamine, ethyl ester). Mean  $\pm$  s.d. \*\*\* $P < 0.001$ . Scale bar, 0.2 mm.

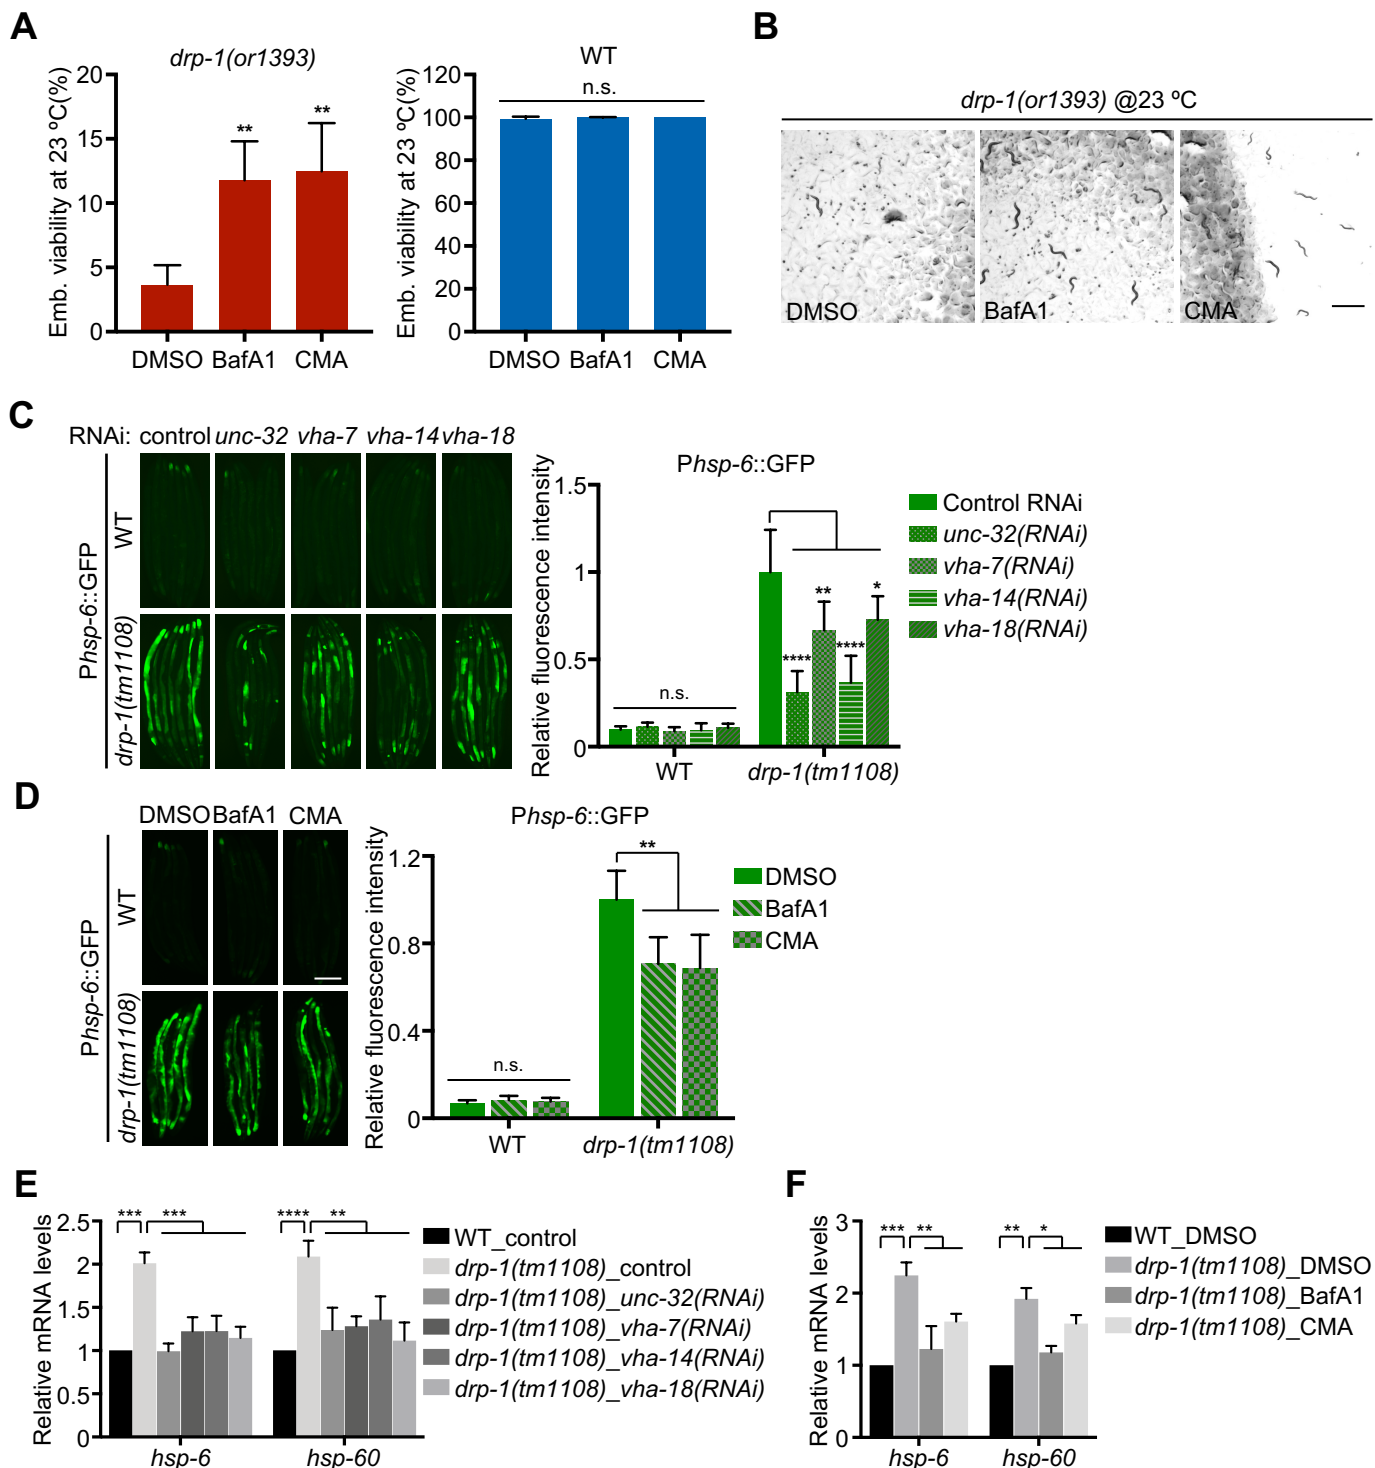

**Fig. S4. Disruptions of V-ATPase activity suppress *drp-1* lethality and mitochondrial defects**

(A, B) Viability of wild-type and *drp-1(or1393)* with DMSO, BafA1 or CMA treatment at 23°C. DMSO, solvent control; BafA1, bafilomycin A1; CMA, concanamycin A. Mean ± s.d. \*\* $P < 0.01$ . Scale bar, 1 mm.

(C, D) *Phsp-6::GFP* expression in wild-type and *drp-1(tm1108)* animals with indicated treatment. Mean ± s.d. \*\*\*\* $P < 0.0001$ , \*\* $P < 0.01$ , \* $P < 0.05$ . n.s., not significant. Scale bar, 0.2 mm.

(E, F) Endogenous expression levels of mitochondrial chaperone genes *hsp-6* and *hsp-60* in animals with indicated treatment. Mean ± s.d. from at least three biological replicates. \*\*\*\* $P < 0.0001$ , \*\*\* $P < 0.001$ , \*\* $P < 0.01$ , \* $P < 0.05$ .

A

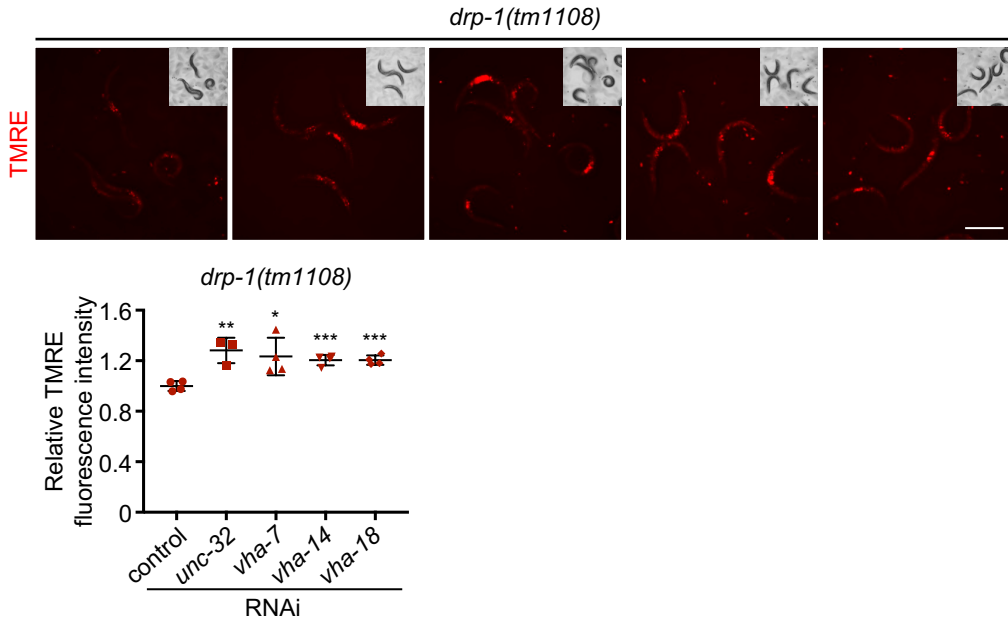

B

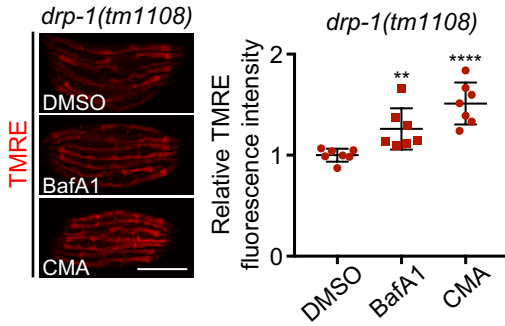

**Fig. S5. Inhibitions of V-ATPase activity increase mitochondrial membrane potential in *drp-1(tm1108)***

(A, B) Animals with indicated treatment were stained with TMRE. Mean  $\pm$  s.d. \*\*\*\* $P < 0.0001$ , \*\* $P < 0.01$ . Scale bar, 0.4 mm.

**A**

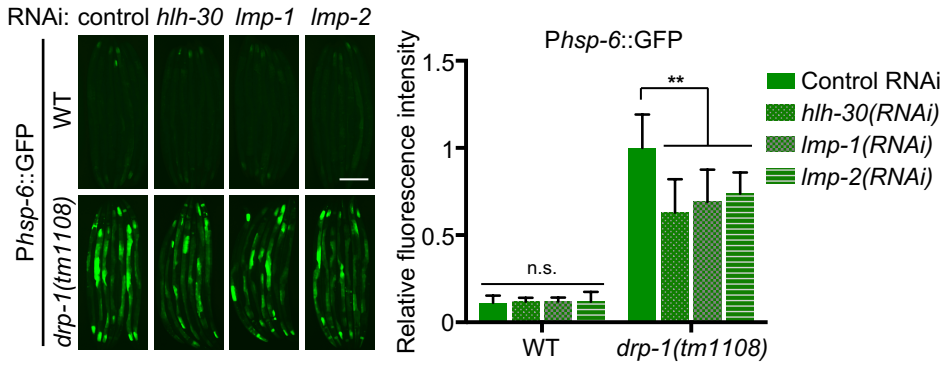

**B**

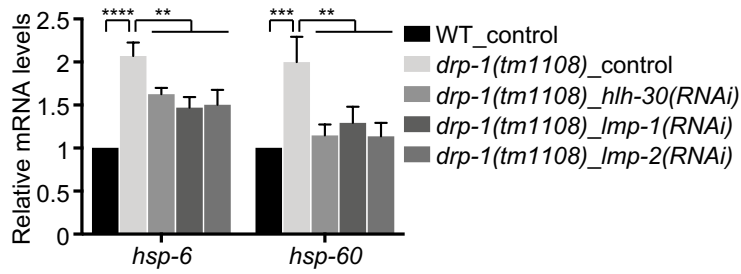

**C**

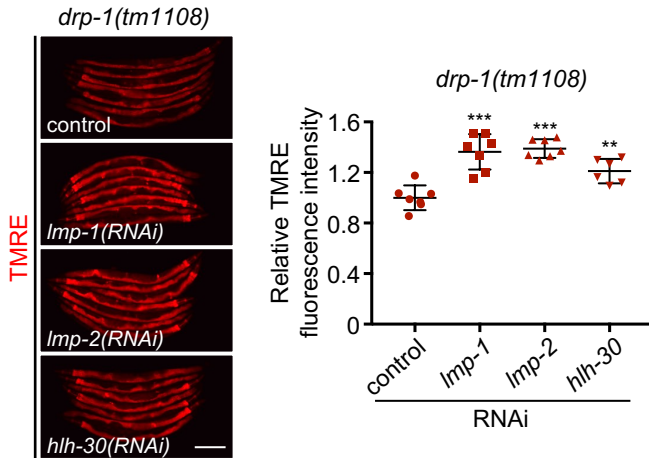

**D**

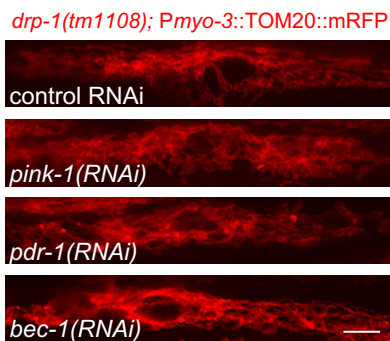

**E**

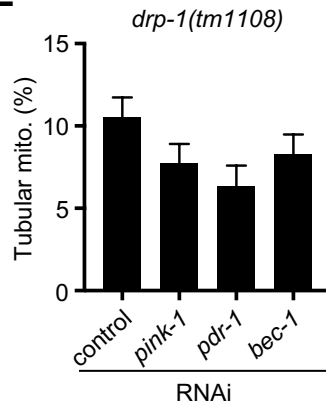

**F**

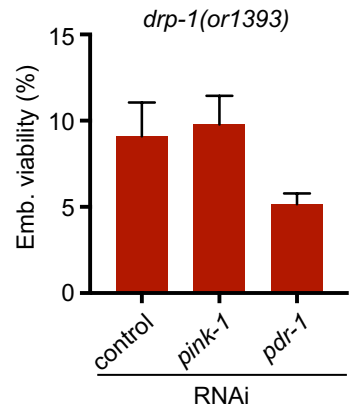

**Fig. S6. Lysosomal dysfunction suppresses *drp-1* mitochondrial fission defects**

- (A) *Phsp-6::GFP* expression in wild-type and *drp-1(tm1108)* animals grown on control or indicated RNAi bacteria clones. Mean  $\pm$  s.d.  $**P < 0.01$ . n.s., not significant. Scale bar, 0.2 mm.
- (B) Endogenous expression levels of mitochondrial chaperone genes *hsp-6* and *hsp-60* in animals with indicated treatment. Mean  $\pm$  s.d. from at least three biological replicates.  $****P < 0.0001$ ,  $***P < 0.001$ ,  $**P < 0.01$ .
- (C) Animals with indicated treatment were stained with TMRE. Mean  $\pm$  s.d.  $***P < 0.001$ ,  $**P < 0.01$ . Scale bar, 0.2 mm.
- (D) Mitochondrial morphology in *drp-1(tm1108)* body wall muscles after indicated RNAi treatment. Scale bar, 5  $\mu$ m.
- (E) Percentage of mitochondria with tubular morphology in *drp-1(tm1108)* body wall muscles after indicated RNAi treatments. Mean  $\pm$  s.d.
- (F) Viability of *drp-1(or1393)* after mitophagy gene inactivations at 23°C.



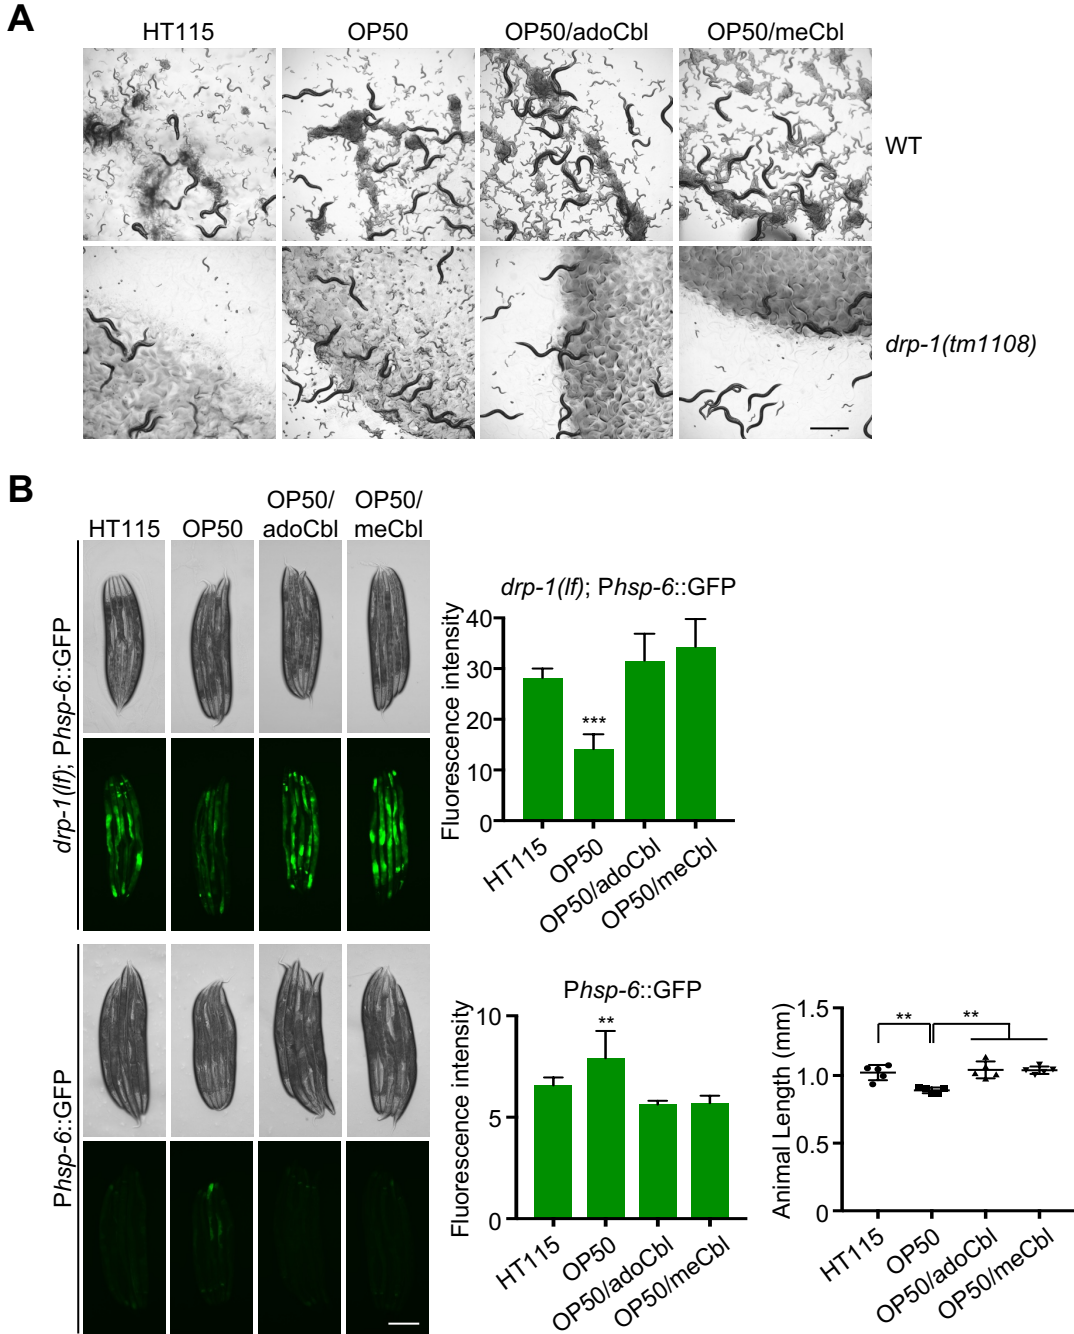

**Fig. S7. Dietary B12 deficiency suppresses *drp-1* defects**

(A) Growth of wild-type (WT) and *drp-1(tm1108)* fed on *E. coli* HT115 or *E. coli* OP50 with or without B12 supplementation at 20°C for 5-day since embryos. Scale bar, 1 mm.

(B) *Phsp-6::GFP* expression and animal lengths in wild-type and *drp-1(lf)* animals raised on *E. coli* HT115 or *E. coli* OP50 with or without B12 supplementation. Mean  $\pm$  s.d. \*\*\* $P < 0.001$ , \*\* $P < 0.01$ . *drp-1(lf)*, *drp-1(tm1108)*. Scale bar, 0.2 mm.

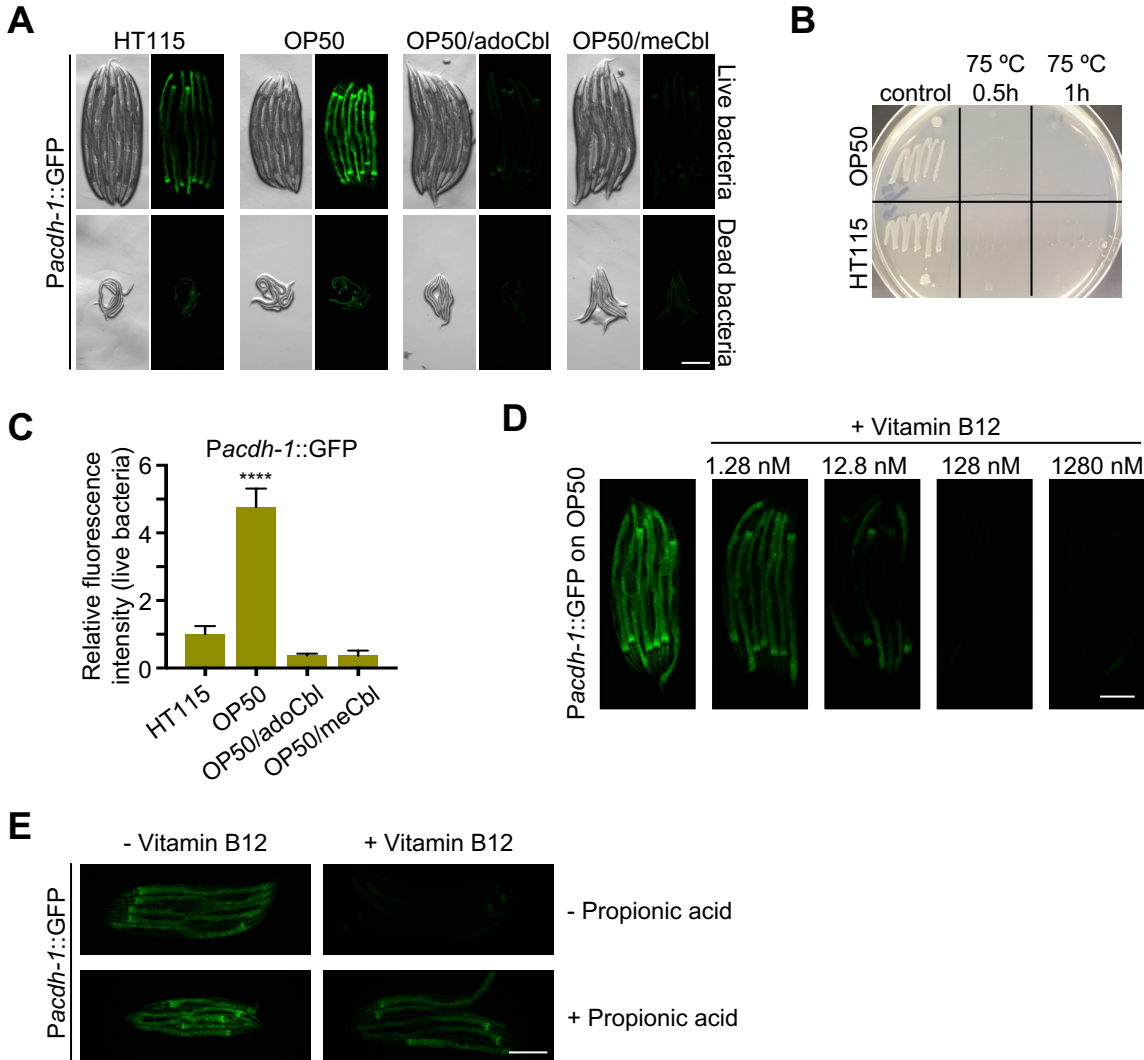

**Fig. S8. *Pacdh-1::GFP* as vitamin B12 indicator**

(A) *Pacdh-1::GFP* animals raised on live (upper panels) or dead (75°C 0.5h, lower panels) *E. coli* HT115 or *E. coli* OP50 with or without B12 supplementation. Scale bar, 0.2 mm.

It is possible that *E. coli* K12 and *E. coli* B strains metabolize B12 differently to affect the animals grown on them. To exclude this possibility, we killed the *E. coli* bacteria by heat. Incubation of the *E. coli* bacteria at 70°C for 30 min was enough to completely kill them. Animals fed on dead bacteria induced *Pacdh-1::GFP* on *E. coli* OP50 (B12 deficient) diets, although much milder than those fed on live bacteria.

(B) Bacteria with or without heat treatment grown on LB agar plate at 37°C overnight.

(C) *Pacdh-1::GFP* expression for animals raised on live *E. coli* HT115 or *E. coli* OP50 with or without B12 supplementation. Mean  $\pm$  s.d. \*\*\*\* $P < 0.0001$ .

(D) *Pacdh-1::GFP* expression for animals raised on *E. coli* OP50 without or with different doses of vitamin B12 supplementation. Scale bar, 0.2 mm.

(E) *Pacdh-1::GFP* expression for animals raised on *E. coli* OP50 with or without propionic acid treatment and B12 supplementation. Propionic acid treatment induced *Pacdh-1::GFP*, which was suppressed by vitamin B12 supplementation. Scale bar, 0.2 mm.

# Supplementary Figure 9

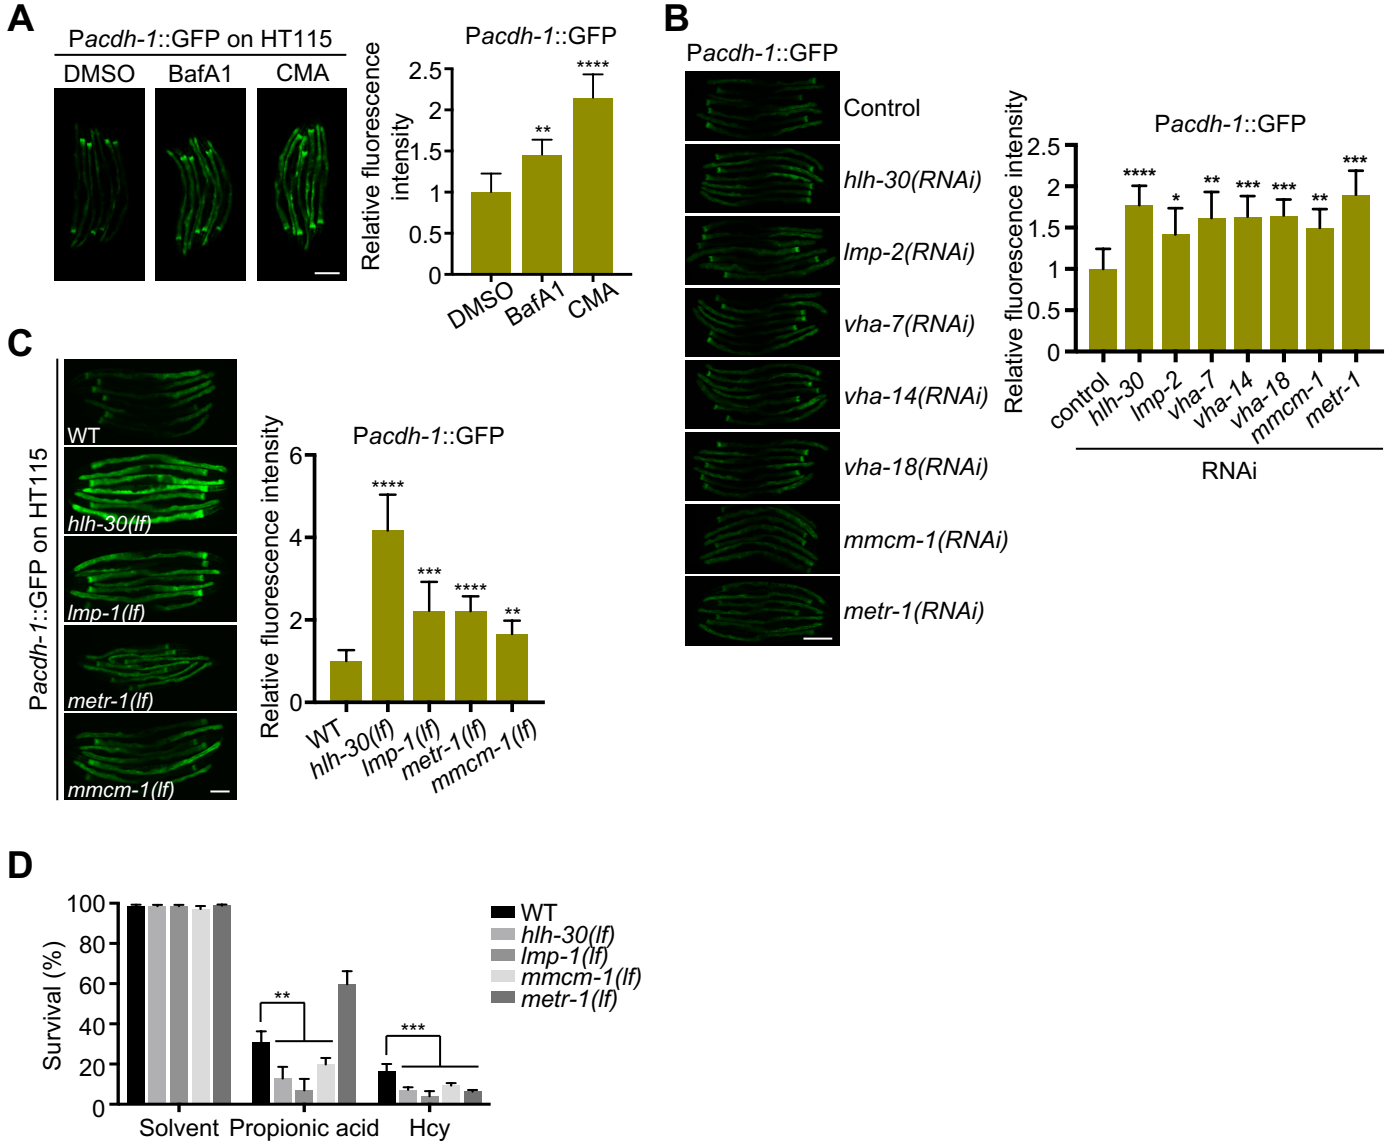

**Fig. S9. Lysosomal dysfunction leads to B12 deficiency**

(A, B) *Pacdh-1::GFP* expression for animals with indicated treatment. Mean  $\pm$  s.d. \*\*\*\* $P < 0.0001$ , \*\*\* $P < 0.001$ , \*\* $P < 0.01$ , \* $P < 0.05$ . Scale bar, 0.2 mm.

(C) *Pacdh-1::GFP* expression for animals with indicated genetic mutation background. Mean  $\pm$  s.d. \*\*\*\* $P < 0.0001$ , \*\*\* $P < 0.001$ , \*\* $P < 0.01$ . Scale bar, 0.1 mm.

(D) Survival of animals treated with solvent control, 100 mM propionic acid, or 15 mM homocysteine (Hcy). Mean  $\pm$  s.d. \*\*\* $P < 0.001$ , \*\* $P < 0.01$ .

Although the propionate shunt is activated when the cellular B12 level is low to breakdown the excess propionate, high propionate loading saturates the propionate shunt. Indeed, a *C. elegans mmcm-1* loss-of-function mutation reduced the survival of animals in the presence of 100 mM propionic acid, consistent with the finding that deletion of PCCA-1, an upstream enzyme of the canonical propionate breakdown pathway, reduced the LD<sub>50</sub> for propionate (1). The *metr-1* methionine synthetase loss-of-function mutation caused animals to be resistant to a high concentration of propionate on an *E. coli* OP50 diet, similar to previous observation (2). Deletion of either *mmcm-1* or *metr-1* caused animals to become hypersensitive to exogenous supplementation of 15 mM homocysteine. Both *hlh-30(lf)* and *lmp-1(lf)* lysosomal mutants were hypersensitive to 100 mM propionic acid and 15 mM homocysteine compared to wild-type, suggesting B12 deficiency in these lysosomal mutants. Overall, these findings indicate that lysosomal dysfunction causes B12 deficiency in animals that were fed B12 proficient *E. coli* HT115 K12 strains, which usually provide enough vitamin B12 to wild-type animals.

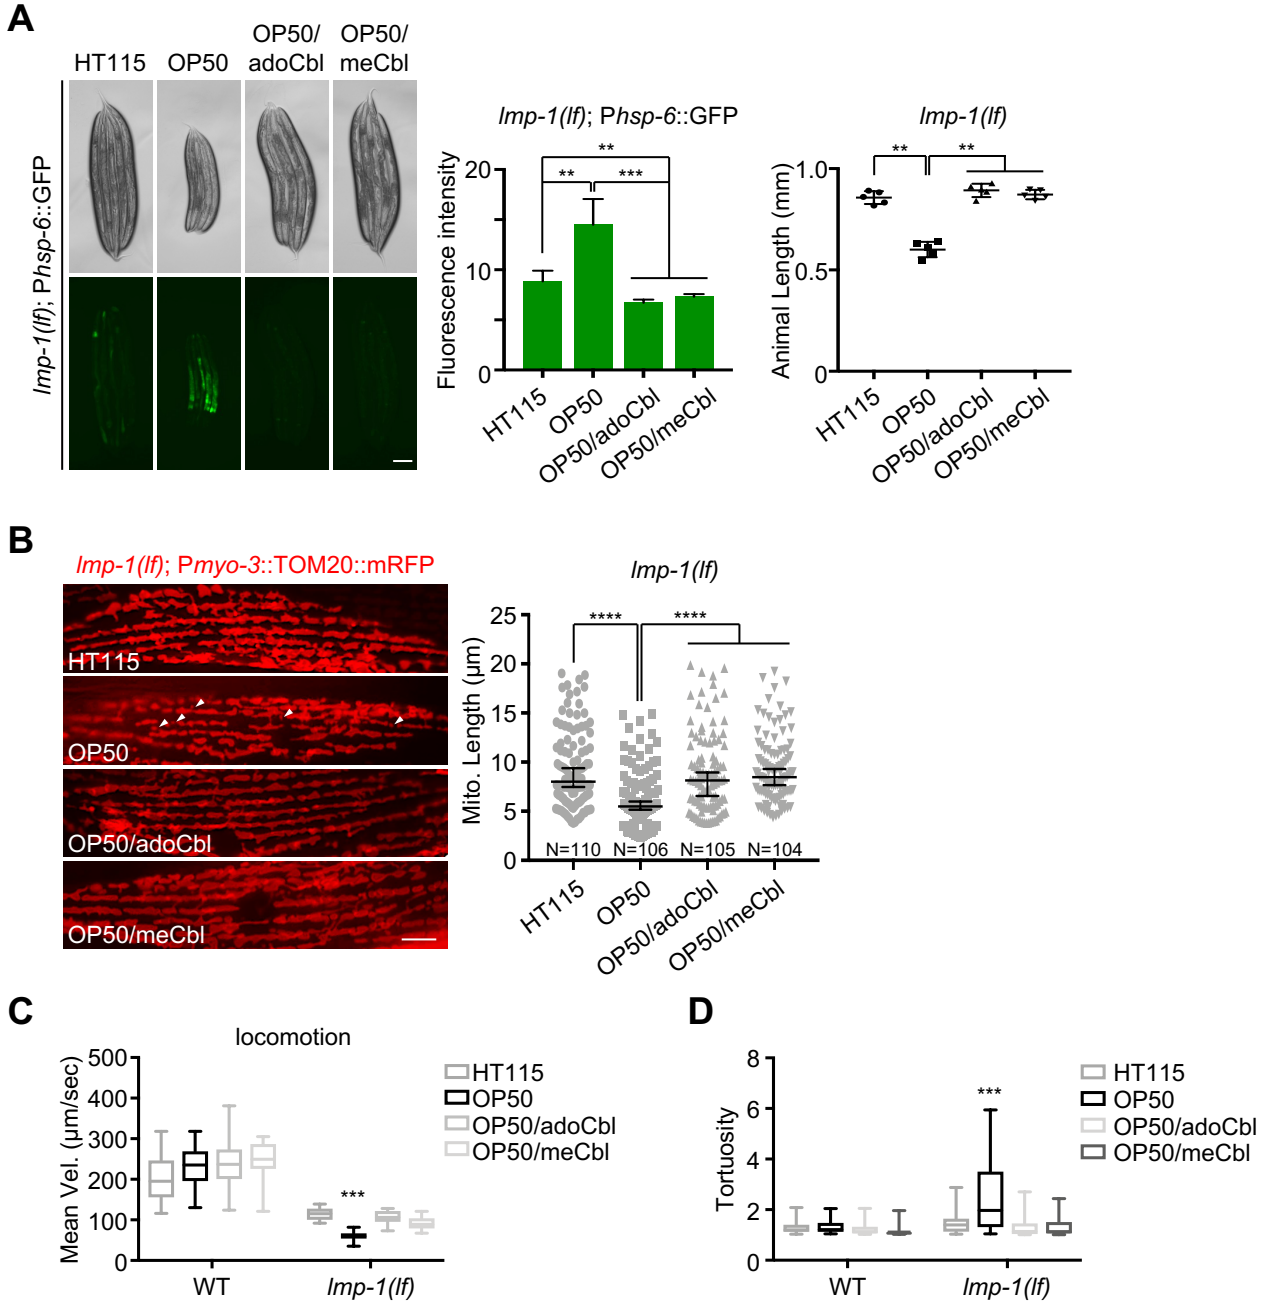

**Fig. S10. Dietary B12 supplementation rescues mitochondrial fragmentation and locomotion defects caused by lysosomal dysfunction**

(A) *Imp-1(lf); Phsp-6::GFP* animals fed on *E. coli* HT115 or *E. coli* OP50 with or without B12 supplementation. Mean  $\pm$  s.d. \*\*\* $P < 0.001$ , \*\* $P < 0.01$ . Scale bar, 0.1 mm.

(B) Mitochondrial morphologies and lengths in body wall muscles in *Imp-1(lf)* fed on *E. coli* HT115 or *E. coli* OP50 with or without B12 supplementation. Arrows mark some examples of fragmented mitochondria. Mitochondrial lengths were calculated by MiNA toolset. Median with 95% C. I. Mann-Whitney test. \*\*\*\* $P < 0.0001$ . N indicates the sample size. Scale bar, 5  $\mu\text{m}$ .

(C, D) Locomotion movement of wild-type (WT) or *Imp-1(lf)* fed on *E. coli* HT115 or *E. coli* OP50 with or without B12 supplementation.  $n=25\sim 40$ . \*\*\* $P < 0.001$ .

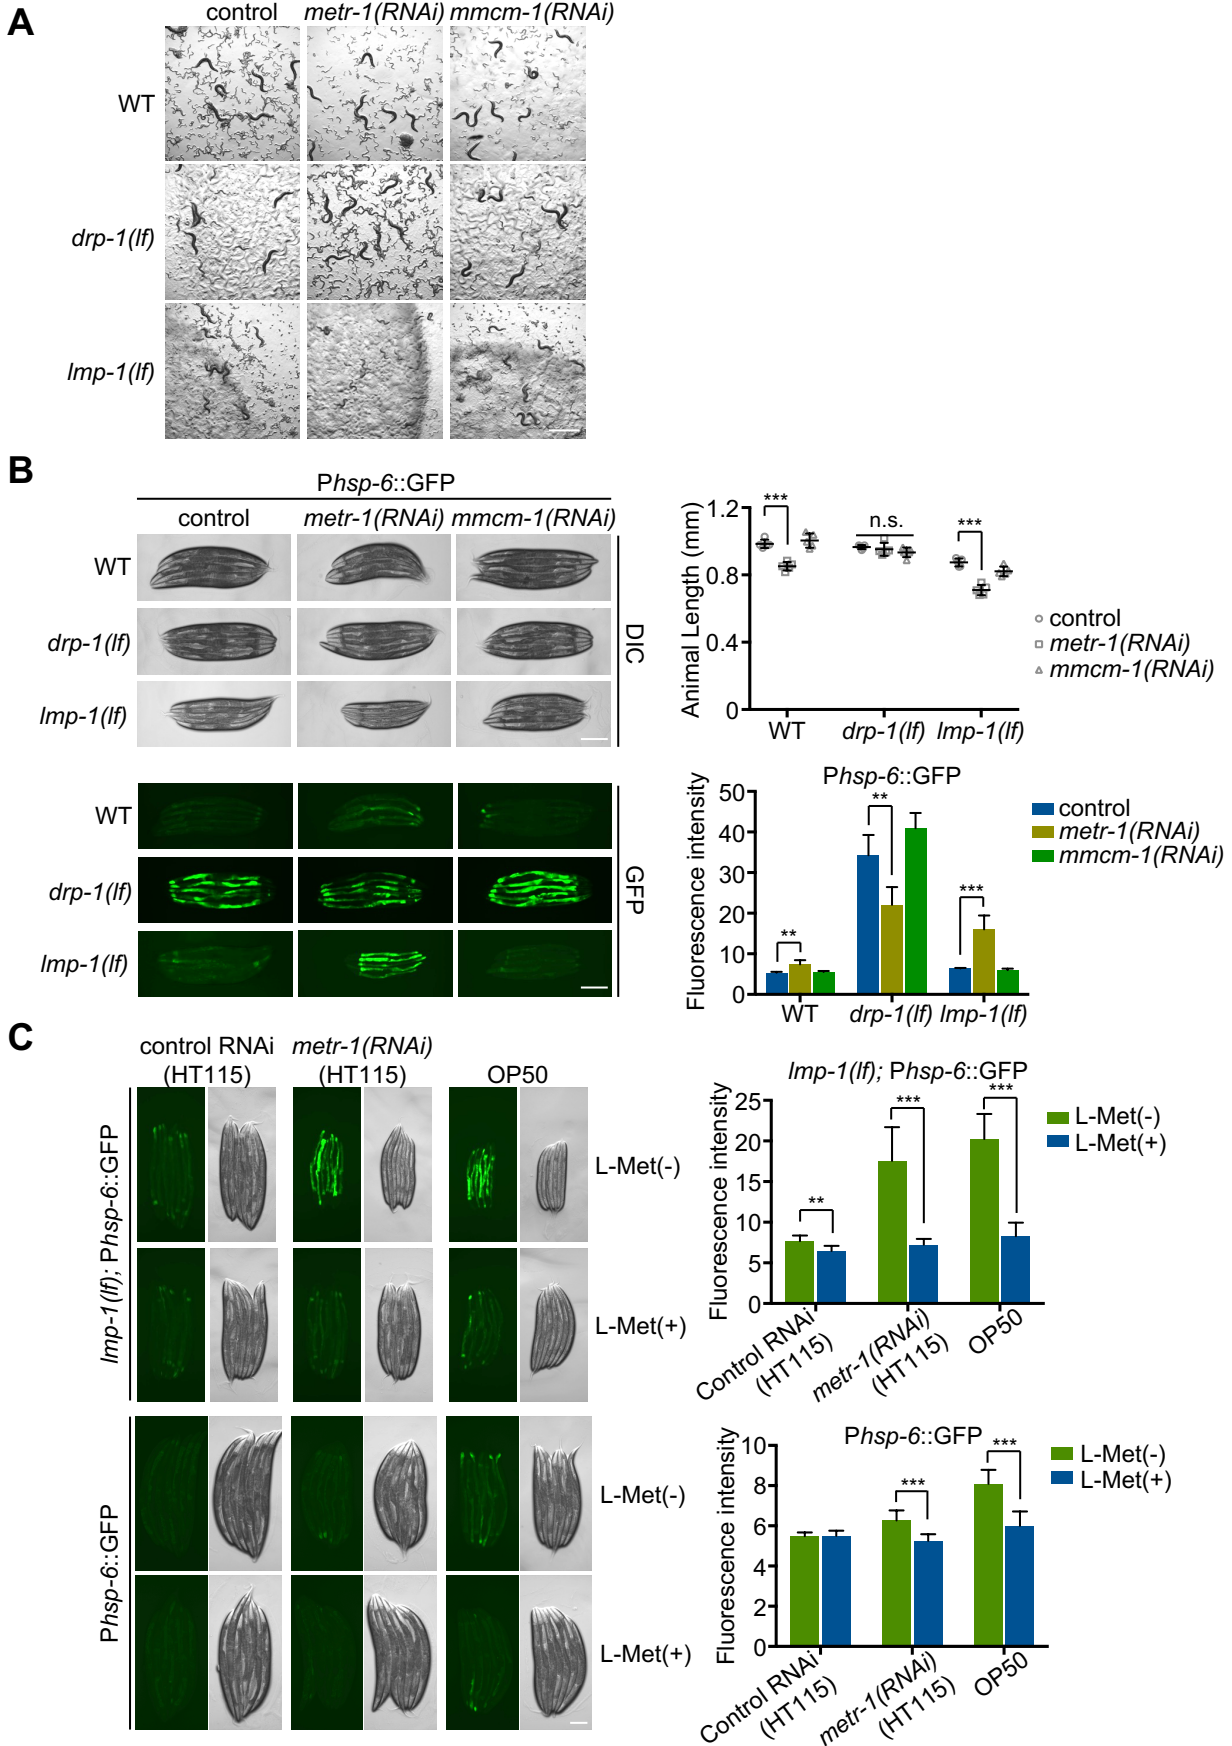

**Fig. S11. Methionine restriction increases mitochondrial fission**

(A) Development of wild-type, *lmp-1(lf)* or *drp-1(lf)* grown on indicated RNAi clones. Scale bar, 1 mm

(B) *Phsp-6::GFP* with wild-type, *lmp-1(lf)* and *drp-1(lf)* background animals grown on indicated RNAi clones. Mean  $\pm$  s.d. \*\*\* $P < 0.001$ , \*\* $P < 0.01$ . n.s., not significant. Scale bar, 0.2 mm.

(C) *Phsp-6::GFP* expression in *lmp-1(lf)* (upper panels) and wild-type (lower panels) animals grown on indicated bacteria with or without methionine supplementation. Mean  $\pm$  s.d. \*\*\* $P < 0.001$ , \*\* $P < 0.01$ . Scale bar, 0.1 mm.

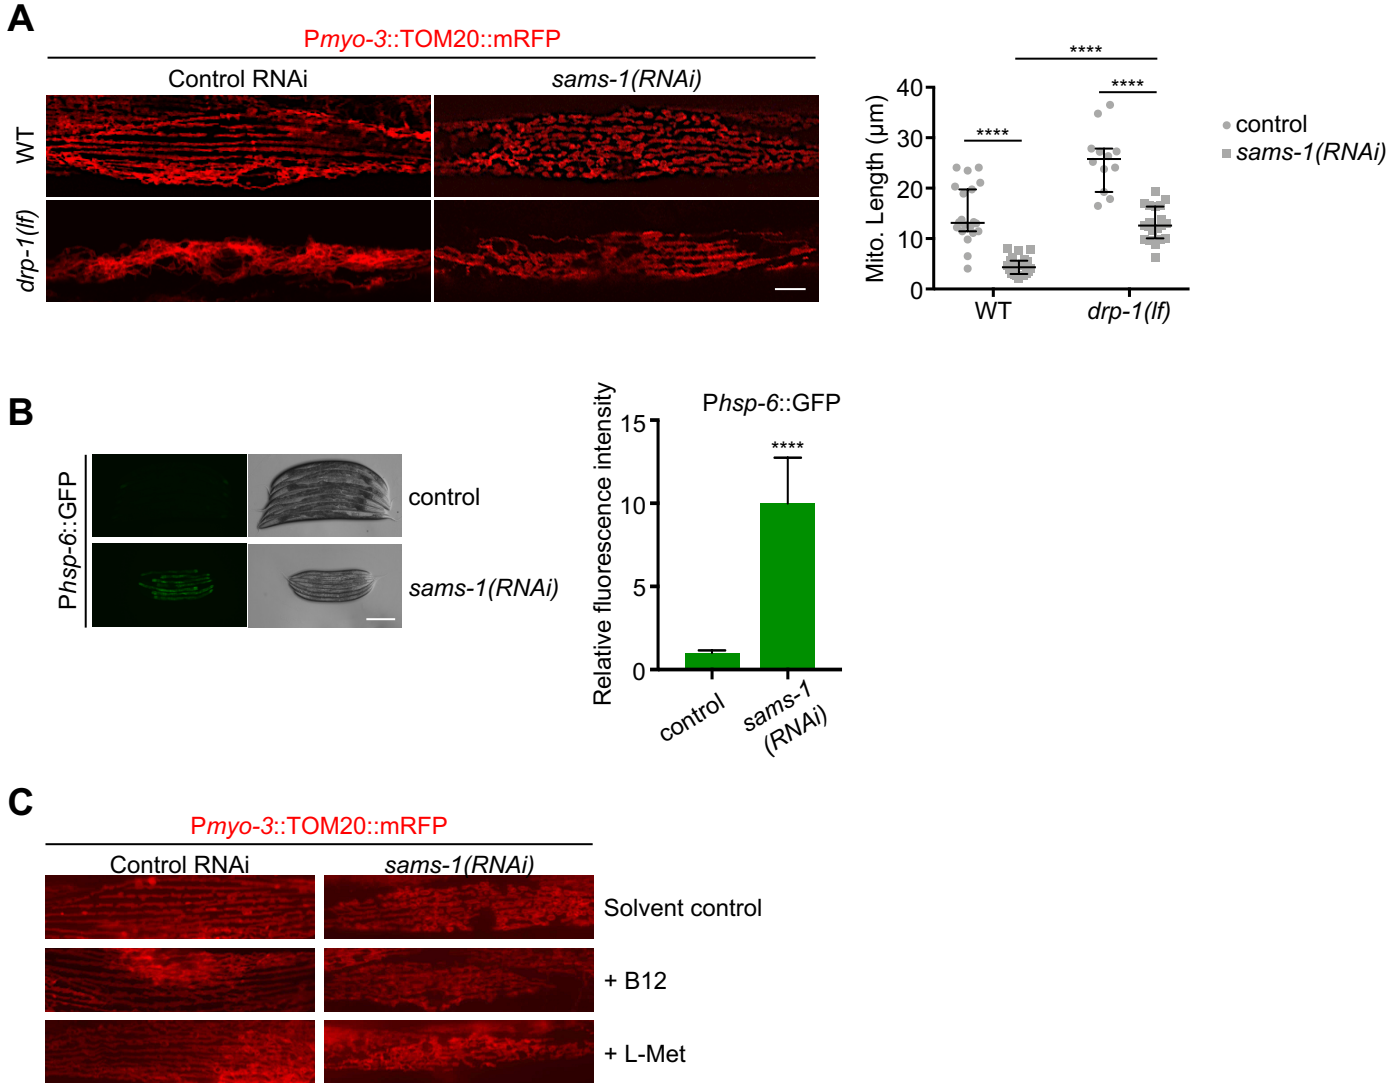

**Fig. S12. Inactivation of *sams-1* increases mitochondrial fission**

(A) Mitochondrial morphology in wild-type and *drp-1(lf)* body wall muscles after indicated RNAi treatment.

Mitochondrial lengths were calculated by MiNA toolset. Median with 95% C. I. Mann-Whitney test. \*\*\*\* $P < 0.0001$ .

Scale bar, 5  $\mu\text{m}$ .

(B) *Phsp-6::GFP* animals grown on control versus *sams-1(RNAi)*. Mean  $\pm$  s.d. \*\*\*\* $P < 0.0001$ . Scale bar, 0.2 mm.

(C) Mitochondrial morphology in animals grown on control or *sams-1(RNAi)* after indicated treatment. Scale bar, 5  $\mu\text{m}$ .



# Supplementary Figure 13

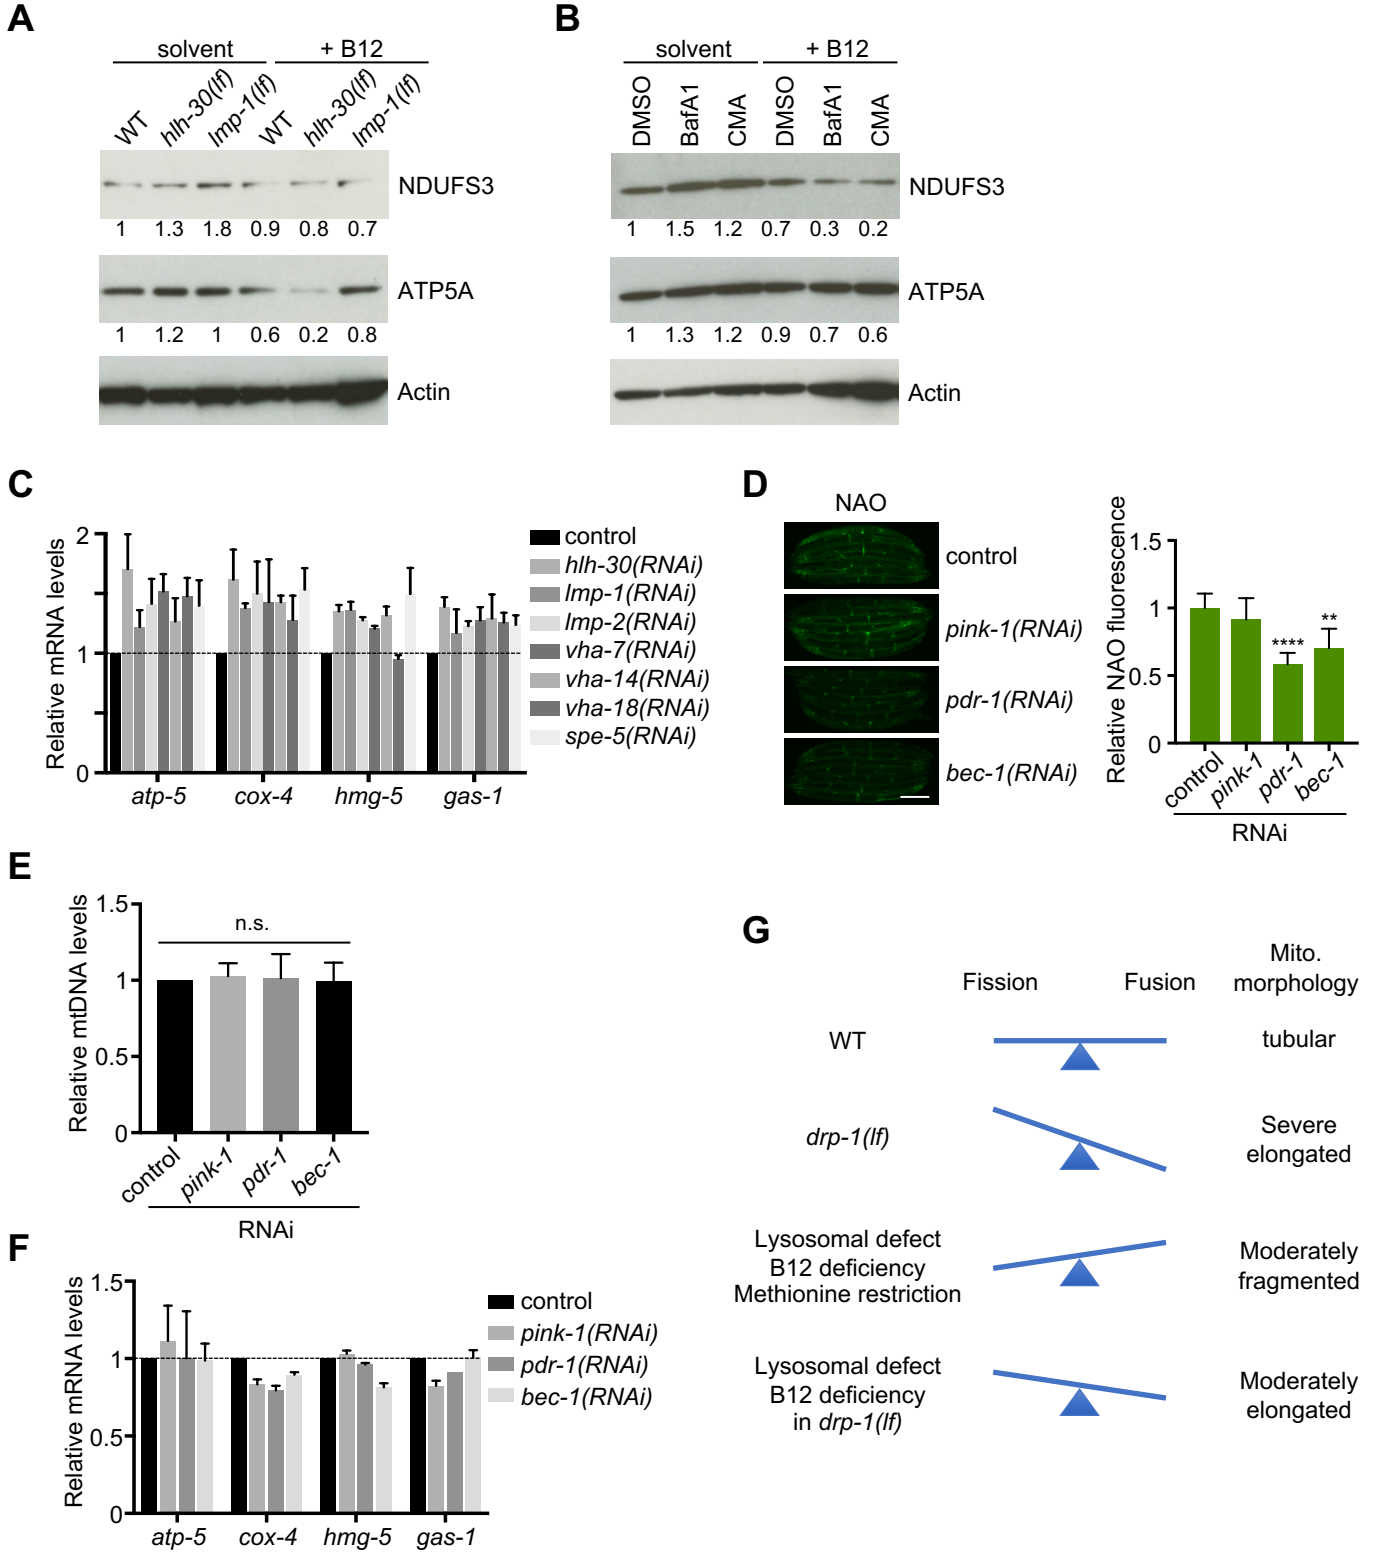

**Fig. S13. Lysosomal dysfunction increases mitochondrial mass by inducing mitochondrial biogenesis**

(A, B) Immunoblots of lysates from animals with indicated treatment. Relative protein levels were indicated below the gel lanes.

(C, F) Expression levels of mitochondrial biogenesis genes *atp-5*, *cox-4*, *hmg-5* and *gas-1* in animals after indicated RNAi treatment. Mean  $\pm$  s.d. from at least three biological replicates.

(D) Animals with mitophagy gene inactivations were stained with Nonyl Acridine Orange (NAO). Mean  $\pm$  s.d. \*\*\*\* $P < 0.0001$ , \*\* $P < 0.01$ . Scale bar, 0.2 mm.

(E) Relative mitochondrial DNA levels in control and mitophagy defective animals. Mean  $\pm$  s.d. from at least three biological replicates. n.s., not significant.

(G) The schematic diagram of the balance of mitochondrial fission-fusion events under different physiological condition.

**REFERENCES**

1. Watson E, et al. (2016) Metabolic network rewiring of propionate flux compensates vitamin B12 deficiency in *C. elegans*. *Elife* 5:2807.
2. Watson E, et al. (2014) Interspecies systems biology uncovers metabolites affecting *C. elegans* gene expression and life history traits. *Cell* 156(4):759–770.
